1 Characterizing Highly Fermentable Carbohydrate Foods in the Diets of Children with  
2 Disorders of Gut-Brain Interaction and Healthy Children

3

4 Vishnu Narayana<sup>1¶</sup>, Jocelyn Chang<sup>1,2¶</sup>, Ann R. McMeans<sup>1,2</sup>, Rona L. Levy<sup>3</sup>, Robert J.  
5 Shulman<sup>1,2&</sup>, Bruno P. Chumpitazi<sup>4,5&\*</sup>

6 <sup>1</sup> Department of Pediatrics, Baylor College of Medicine, Houston, TX, USA

7 <sup>2</sup> Children's Nutrition Research Center, Houston, TX, USA

8 <sup>3</sup> School of Social Work, University of Washington, Seattle, WA, USA

9 <sup>4</sup> Duke University School of Medicine, Department of Pediatrics, Durham, NC USA

10 <sup>5</sup> Duke Clinical Research Institute, Durham, NC USA

11

12 \* Corresponding Author:

13 Bruno P. Chumpitazi

14 Email: [Bruno.chumpitazi@duke.edu](mailto:Bruno.chumpitazi@duke.edu) (BPC)

15

16 ¶ These authors contributed equally to the work

17 & These authors also contributed equally to the work

## 18 **Abstract**

### 19 **Objectives**

20 Restricting fermentable oligosaccharides, disaccharides, monosaccharides, and polyols  
21 (**FODMAPs**) intake can alleviate symptoms in children with gut-brain interaction disorders  
22 (**DGBI**). Due to the restrictive nature of the low FODMAP diet (**LFD**), the less restrictive  
23 FODMAP Gentle diet (**FGD**) has been suggested. However, the types of high FODMAP  
24 foods and carbohydrates commonly consumed by US children are unknown, as is the  
25 impact of the FGD on a typical diet. This project aimed to identify the high FODMAP foods  
26 and proportions of FODMAP carbohydrates consumed by children with DGBI and healthy  
27 children (**HC**), and to determine which usually ingested FODMAPs would be restricted on  
28 the FGD.

### 29 **Methods**

30 Three-day diet records from both HC and children with DGBI were analyzed to assess  
31 the type of high FODMAP foods and carbohydrates ingested. Results were compared  
32 between the groups. The ingested FODMAPs that would be restricted on the FGD was  
33 determined.

### 34 **Results**

35 The number of foods ingested daily was similar between children with DGBI and HC ( $12.3$   
36  $\pm 4.2$  vs  $12.9 \pm 3.4$ , respectively); high FODMAP foods comprised most foods eaten in  
37 both groups. Children with DGBI (vs HC) ate less high FODMAP foods per day ( $6.5 \pm 2.3$   
38 vs  $8.7 \pm 2.4$ ,  $P < 0.0001$ , respectively). Fructans were the most consumed FODMAP  
39 carbohydrate in both groups and children with DGBI (vs HC) consumed fewer fructans,

40 lactose, fructose, and polyols (all  $P < 0.0001$ ). The top 3 food categories consumed in both  
41 groups were wheat-containing foods, dairy, and fruits and 100% fruit juices. In children  
42 with DGBI, 80.9% of the high FODMAP foods consumed would be limited on the FGD.

## 43 **Discussion**

44 Children with DGBI consume significantly fewer high FODMAP foods and  
45 carbohydrates than HC. In both groups, the top consumed FODMAP carbohydrates are  
46 fructans, lactose, and fructose. A FODMAP Gentle diet would restrict a large majority of  
47 high FODMAP foods consumed by children with DGBI.

## 48 Introduction

49 Abdominal pain-related disorders of gut-brain interaction (**DGBI**) such as irritable  
50 bowel syndrome are highly prevalent. Contributors to symptoms include visceral  
51 hypersensitivity, psychosocial distress, gut dysmotility, abnormal gut immune function,  
52 abnormal gut microbiota composition, and diet.(1) Dietary culprits include highly  
53 fermentable oligosaccharides, disaccharides, monosaccharides, and polyols  
54 (**FODMAPs**) which are carbohydrates that are poorly absorbed in the small intestine.(2)  
55 After reaching the colon, FODMAPs are rapidly fermented, producing gas and other  
56 metabolites.(2-4) The gas and metabolite production, in addition to osmotically-driven  
57 water secretion into the lumen of the colon can contribute to DGBI symptom  
58 generation.(3) Restricting FODMAP dietary intake through a low FODMAP diet (**LFD**)  
59 may ameliorate pediatric and adult DGBI symptoms, including pain, bloating, flatus,  
60 diarrhea, nausea, and heartburn.(5-7)

61 Unfortunately, there also can be challenges with implementing a LFD, including  
62 the need for appropriate educational resources (e.g., dietitian knowledgeable about the  
63 LFD) and patient adherence.(8, 9) Some patients have reported cost of the diet to be a  
64 barrier to adherence.(10) In addition, given the restrictive nature of a LFD, there is  
65 concern for potential adverse effects such as decreases in bacteria associated with health  
66 (e.g., *Bifidobacteria*), the potential for unintentional weight loss, and risk of developing  
67 disordered eating. Due to these possible negative impacts, some experts do not currently  
68 recommend a LFD for children.(11-14) This has led to proposals for diets that restrict  
69 fewer fermentable carbohydrates (e.g., the “FODMAP Gentle” diet, **FGD**) in an attempt to  
70 be more pediatric-friendly.(14, 15) However, determining potentially effective and less

71 restrictive diets such as the FGD for children is hampered by lack of knowledge related  
72 to which high FODMAP foods normally are consumed by children and whether the  
73 FODMAP intake of healthy children (**HC**) differs from that of children with DGBI. This  
74 information is needed to determine the degree to which a less restrictive diet (e.g., FGD)  
75 may impact FODMAP intake. Therefore, we sought to identify the high FODMAP foods  
76 and proportions of FODMAP carbohydrates consumed by children with DGBI and HC,  
77 and to determine which usually ingested FODMAPs would be restricted on the FGD.

## 78 **Materials and methods**

### 79 **Study Design**

80           The data analyzed in this study were dietary intake from a large trial of children  
81 with DGBI (NCT03823742) recruited in the study between February 22, 2019 through  
82 May 1, 2024, and the dietary intake of HC from a separate study which recruited subjects  
83 between May 1, 2013 and October 29, 2018. The Baylor College of Medicine Institutional  
84 Review Board for Human Subjects approved both studies. Written informed consent was  
85 obtained from study participants' parents (or guardians) and assent from study  
86 participants. Prior to any kind of intervention, parents of participants in both studies  
87 completed a 3-day baseline food record of their child's habitual diet after receiving  
88 detailed information on how to complete the diet records.

### 89 **Study Population**

90           Participants were children 7-12 years of age from the greater Houston, Texas  
91 metropolitan area. Exclusion criteria for both children with DGBI and HC included:  
92 children following specific diet alterations (e.g., LFD); those with eating disorders; any  
93 recent weight loss ( $\geq 5\%$  of body weight); or organic gastrointestinal or systemic diseases  
94 (e.g., celiac disease, Crohn's disease, cancer). Children with DGBI met pediatric Rome  
95 IV criteria for an abdominal pain-related DGBI.(16) HC could not have had any healthcare  
96 visits related to abdominal pain.

### 97 **Data Collection**

98           Following enrollment, 3-day food records of foods and drinks consumed by the  
99 children were completed by the parents. Details included the name of the food, amount

100 eaten, and parts of the food if the food had multiple components (e.g., a sandwich had all  
101 components listed). Diet records then were analyzed by two research dietitians well-  
102 versed in DGBI and FODMAPs and in providing LFD education. Data were entered into  
103 the University of Minnesota Nutrition Data System for Research software version  
104 2019.(17) Both children with DGBI and HC kept 2-week pain and stooling diaries as  
105 previously reported to insure they met entry criteria.(18, 19)

## 106 **Analysis and Classification of Foods**

107 High FODMAP foods are identified using guidelines derived from the Monash  
108 University Low FODMAP dietary food guide and smartphone app.(20) High FODMAP  
109 foods are further characterized by the type of FODMAP carbohydrate within the food, the  
110 food categories to which the foods belong, and whether the foods contained high fructose  
111 corn syrup as a major ingredient. Statistical comparisons between the dietary intake of  
112 the two groups were made using both chi-square for categorical data and t-testing for  
113 continuous data using IBM SPSS Statistics for Windows (IBM Corp. Released 2023. IBM  
114 SPSS Statistics for Windows, Version 29.0.2.0 Armonk, NY: IBM Corp). In addition, based  
115 on published guidelines related to the FGD, we determined whether the high FODMAP  
116 foods consumed by children with DGBI would have been restricted.(14, 15)

## 117 Results

118 At the time of analysis, 77 children with DGBI had completed baseline diet records  
119 for the ongoing study. From the previous study, data from 64 HC were available. Self-  
120 reported demographic data were similar between groups (Table 1).

121

122 **Table 1. Demographics of Children with DGBI versus Healthy Children**

|                                         | <b>DGBI (n=77)</b> | <b>HC (n=64)</b> | <b>P-value</b> |
|-----------------------------------------|--------------------|------------------|----------------|
| <b>Age</b> (years $\pm$ SD)             | 10.0 $\pm$ 1.7     | 9.7 $\pm$ 1.5    | 0.25           |
| <b>Sex</b>                              |                    |                  | 0.68           |
| Female, n (%)                           | 46 (59.7)          | 36 (56.3)        |                |
| Male, n (%)                             | 31 (40.3)          | 28 (43.8)        |                |
| <b>Race, ethnicity</b> , n (%)          |                    |                  | 0.07           |
| White, non-Hispanic                     | 22 (28.6)          | 32 (50.0)        |                |
| White, Hispanic                         | 16 (20.8)          | 14 (21.9)        |                |
| Black, non-Hispanic                     | 23 (29.9)          | 10 (15.6)        |                |
| Black, Hispanic                         | 4 (5.2)            | 2 (3.1)          |                |
| Asian, non-Hispanic                     | 2 (2.6)            | 0 (0.0)          |                |
| American Indian/ Hawaiian, non-Hispanic | 0 (0.0)            | 0 (0.0)          |                |
| American Indian/ Hawaiian, Hispanic     | 4 (5.2)            | 1 (1.6)          |                |
| More than one race, non-Hispanic        | 1 (1.3)            | 3 (4.7)          |                |
| More than one race, Hispanic            | 1 (1.3)            | 2 (3.1)          |                |
| Black, no ethnicity identified          | 1 (1.3)            | 0 (0.0)          |                |
| Hispanic, no race identified            | 3 (3.9)            | 0 (0.0)          |                |

123

124 Out of a total of 4734 foods consumed in both groups, 2792 (59.0%) were high  
125 FODMAP. Children with DGBI consumed fewer high FODMAP foods daily per child than  
126 HC (Table 2). High FODMAP foods comprised 1481 (52.5%) and 1311 (68.6%) of total  
127 foods consumed by children with DGBI and HC, respectively.

128



129 **Table 2. Daily Food Consumption and High FODMAP Intake in Children with DGBI**  
 130 **versus Healthy Children**

|                                                                       | <b>DGBI<br/>(n=77)</b> | <b>HC<br/>(n=64)</b> | <b>P-value</b> |
|-----------------------------------------------------------------------|------------------------|----------------------|----------------|
| <b>Total Foods Consumed</b>                                           | 2822 <sup>1</sup>      | 1912 <sup>1</sup>    |                |
| Total Foods per subject per day<br>(mean ± SD)                        | 12.3 ± 4.2             | 12.9 ± 3.4           | 0.36           |
| High FODMAP Foods per subject per day<br>(mean ± SD)                  | 6.5 ± 2.3              | 8.7 ± 2.4            | <0.001         |
|                                                                       |                        |                      |                |
| <b>FODMAP Sugar, n (%)<sup>2</sup></b>                                |                        |                      |                |
| Fructans <sup>3</sup>                                                 | 850 (30)               | 748 (39)             | <0.0001        |
| Lactose <sup>4</sup>                                                  | 552 (20)               | 527 (28)             | <0.0001        |
| Fructose <sup>5</sup>                                                 | 412 (15)               | 570 (30)             | <0.0001        |
| Polyols <sup>6</sup>                                                  | 82 (3)                 | 100 (5)              | <0.0001        |
| Galacto-oligosaccharides <sup>7</sup>                                 | 82 (3)                 | 53 (3)               | 0.79           |
| HFCS <sup>8</sup>                                                     | 248 (9)                | 388 (20)             | <0.0001        |
|                                                                       |                        |                      |                |
| <b>Food Category, n (%)<sup>2</sup></b>                               |                        |                      |                |
| Wheat                                                                 | 557 (20)               | 534 (28)             | <0.0001        |
| Dairy                                                                 | 344 (12)               | 342 (18)             | <0.0001        |
| Fruits and 100% Fruit Juices                                          | 168 (6)                | 194 (10)             | <0.0001        |
| Beverages (e.g., sodas, juice w/ high fructose<br>corn syrup)         | 144 (5)                | 93 (5)               | 0.71           |
| Condiments (e.g., salad dressing, mayonnaise,<br>ketchup, jelly, jam) | 125 (4)                | 74 (4)               | 0.35           |
| Sweet Snacks (e.g., candy, cookies, brownies)                         | 125 (4)                | 143 (7)              | <0.0001        |
| Vegetables                                                            | 111 (4)                | 80 (4)               | 0.67           |
| Savory Snacks (e.g., chips)                                           | 84 (3)                 | 90 (5)               | 0.002          |
| Sweeteners (e.g., fructose, honey, added<br>polyols)                  | 64 (2)                 | 35 (2)               | 0.30           |
| Legumes                                                               | 42 (1)                 | 16 (1)               | 0.06           |
| Nuts, seeds, nut/seed butters                                         | 8 (<1)                 | 13 (1)               | 0.04           |
|                                                                       |                        |                      |                |
| <b>Top High FODMAP Foods Consumed, n (%)<sup>2</sup></b>              |                        |                      |                |
| Milk                                                                  | 146 (5.2)              | 121 (6.3)            | .09            |
| Sodas <sup>9</sup>                                                    | 69 (2.4)               | 31 (1.6)             | .05            |
| Fructose-sweetened drinks <sup>9</sup>                                | 67 (2.4)               | 45 (2.4)             | 0.96           |
| Breaded Animal Protein <sup>10</sup>                                  | 65 (2.3)               | 34 (1.8)             | 0.22           |
| Fresh fruit                                                           | 62 (2.2)               | 74 (3.9)             | <0.001         |
| Loaf bread <sup>11</sup>                                              | 61 (2.2)               | 63 (3.3)             | 0.02           |
| Savory condiments <sup>12</sup>                                       | 58 (2.1)               | 18 (0.9)             | <0.005         |
| 100% Fruit juice                                                      | 44 (1.6)               | 46 (2.4)             | 0.04           |
| Sweet/enriched bread <sup>11</sup>                                    | 43 (1.5)               | 51 (2.8)             | <0.01          |
| Pizza <sup>10</sup>                                                   | 42 (1.5)               | 34 (1.8)             | 0.44           |
| Mixed pasta <sup>10</sup>                                             | 35 (1.2)               | 35 (1.8)             | 0.10           |
| Cookies <sup>11</sup>                                                 | 34 (1.2)               | 35 (1.8)             | 0.08           |
| Seasonings <sup>13</sup>                                              | 23 (0.8)               | 41 (2.1)             | <0.001         |

|                        |          |          |         |
|------------------------|----------|----------|---------|
| Crackers <sup>11</sup> | 20 (0.7) | 40 (2.1) | <0.0001 |
| Fruit snacks           | 20 (0.7) | 35 (1.8) | <0.0005 |

131  
132  
133  
134  
135  
136  
137  
138  
139  
140  
141  
142  
143  
144  
145  
146  
147  
148  
149  
150  
151  
152  
153  
154  
155

<sup>1</sup>Total count of all foods consumed

<sup>2</sup>Percent out of total foods consumed

<sup>3</sup>Fructans are found in wheat, garlic, onion, legumes, and inulin and chicory root which are types of fiber and the main ingredient in fiber supplements or added to baked goods to increase fiber content.

<sup>4</sup>Lactose is found in dairy products and may be added to some food products such as chocolate bars, flavored chips, and baked sweets.

<sup>5</sup>Fructose is found in many fruits and some vegetables such as apples, pears, and asparagus; it is found in honey and agave syrup and may be added as fructose or high fructose corn syrup to provide a sweet flavor in different food products, such as sodas, jams, ketchup, and baked sweets.

<sup>6</sup>Polyols can be found in different fruits such as peaches, plums, and avocado and may be added in different forms (i.e., sorbitol, mannitol, xylitol) to impart a sweet flavor to different food products, most notably sugar free candies and sugar free gums.

<sup>7</sup>Galacto-oligosaccharides can be found in beans and nuts.

<sup>8</sup>High fructose corn syrup; a syrup of fructose and glucose, usually found in a 55%/45% ratio in food products

<sup>9</sup>Contains high fructose corn syrup

<sup>10</sup>Contains wheat, and onion and/or garlic seasoning

<sup>11</sup>Contains wheat and may contain high fructose corn syrup

<sup>12</sup>Contains onion, garlic, and/or high fructose corn syrup

<sup>13</sup>Contains dried or powdered onion and/or garlic added during at home food preparation process. Does not include packaged foods that already contain spices.

156           Based on the FODMAP carbohydrate, fructan-containing foods were the most  
157 numerous in the diet of both groups, followed by foods containing lactose and fructose  
158 (Table 2). Individual foods containing more than one type of FODMAP contributed 501  
159 (33.8%) and 638 (48.7%) of the high FODMAP foods consumed by children with DGBI  
160 and HC, respectively. Children with DGBI (vs HC) consumed significantly less fructans,  
161 lactose, fructose, and polyols but not galactans.

162           Based on food category, wheat-containing foods were the most prevalent, followed  
163 by dairy and fruits/100% fruit juices (Table 2); children with DGBI consumed significantly  
164 fewer of these foods compared to HC. Children with DGBI (vs HC) consumed less  
165 FODMAP-containing sweet and savory snacks. There was no significant difference in  
166 intake of beverages, condiments, vegetables, and sweeteners.

167           Based on the high FODMAP-containing foods, children with DGBI consumed most  
168 frequently milk, sodas, and fructose-sweetened drinks (e.g., fruit-flavored drinks  
169 containing high fructose corn syrup) whereas HC consumed milk, fresh fruit, and wheat-  
170 containing loaf bread (Table 2). High FODMAP foods containing high fructose corn syrup  
171 as a major ingredient were consumed by 16.7% (248) of children with DGBI and 29.6%  
172 (388) of HC.

173           In children with DGBI, 1198 (80.9%) of the consumed high FODMAP foods would  
174 be restricted on a FGD. Of the 283 high FODMAP foods permitted on a FGD, 139 (49.1%)  
175 contained high fructose corn syrup as a major ingredient. Of these, beverages and  
176 condiments (e.g., sodas, jam/jelly, ready-to-drink lemonade, pancake syrup, and flavored  
177 drinks) comprised a significant proportion.

## 178 **Discussion**

179           Determining the type of high FODMAP foods and FODMAP carbohydrates  
180 consumed by children with DGBI and HC children is important for tailoring educational  
181 content and aid in the creation of diets that restrict FODMAP intake. We determined that  
182 high FODMAP foods comprise a majority of the foods eaten by both children with DGBI  
183 and HC. Children with DGBI (vs HC) consumed fewer high FODMAP foods and several  
184 FODMAP carbohydrates. We also identified that a large majority of FODMAP foods  
185 normally eaten by children with DGBI would be restricted on a FGD.

186           We hypothesize the less frequent ingestion of high FODMAP foods by children  
187 with DGBI may relate to self-restriction (either intentional or due to unconscious behavior)  
188 to avoid worsening their GI symptoms. Supporting the former, a recent study of school  
189 children reporting bothersome GI symptoms identified an association between high  
190 FODMAP foods and worse GI symptoms.(21) Furthermore, children with IBS self-restrict  
191 more foods than healthy children.(22) Additional studies are needed to determine the  
192 reasons why children with DGBI eat fewer FODMAPs than HC.

193           To our knowledge, this is the first study to describe FODMAP intake in children  
194 with DGBI and HC under normal dietary circumstances. Fructans were the FODMAP  
195 carbohydrate ingested most commonly in both groups. A U.S. Department of Agriculture  
196 survey from 1994-1996 estimated that 75% of fructan intake in individuals was from wheat  
197 and 25% from onions.(23) Our study findings are in agreement with the survey data, as  
198 wheat-containing products, particularly breaded meat products such as chicken nuggets  
199 and wheat bread, were the primary contributors to fructan intake for both groups. Onion  
200 and garlic powders via seasoning contributed to fructan intake to a lesser degree. Some

201 of the consumed foods containing onion and garlic powder seasonings included flavored  
202 chips, processed and seasoned meats, and seasoned beans (i.e., refried beans).  
203 Fructans, which arrive essentially intact into the colon after consumption, are often a focus  
204 of a low FODMAP diet as fructans have been found to induce more DGBI symptoms than  
205 other FODMAPs.(24) Given our finding that wheat (a FODMAP) is the most commonly  
206 ingested category of food, particular attention to restriction of wheat products should be  
207 a focus of a reduced FODMAP diet.

208 After fructans, lactose and fructose were the most commonly ingested FODMAPs.  
209 Lactose malabsorption is not more common in those with DGBI than HC but lactose  
210 intolerance appears to be; likely related to visceral hyperalgesia commonly found in those  
211 with DGBI.(25) Similar to education regarding wheat ingestion, our data would suggest  
212 emphasis also should be given to a reduction in fructose-sweetened drinks including  
213 sodas and 100% fruit juice in children with DGBI. In contrast, a global reduction in fresh  
214 fruit might not be warranted given its value as an important component of a healthy diet.

215 We found that the vast majority of high FODMAP foods commonly consumed by  
216 the children with DGBI would be restricted on a FGD which has been proposed as an  
217 alternative, pediatric-friendly and less restrictive version to the traditional LFD.(14, 15)  
218 The United Kingdom's National Institute of Clinical Excellence (NICE) dietary guidelines  
219 that reduce FODMAP intake also has been recommended but data are conflicting as to  
220 whether it has similar (worse or better) efficacy as the traditional LFD in adults and  
221 children.(14) One particular advantage of the FGD may be its relative ease related to  
222 education and adherence as only 15 different food and/or food types (e.g., wheat) are  
223 restricted. However, its efficacy in children with DGBI remains to be determined.

224 Of the high FODMAP foods consumed by the children in our study that would be  
225 allowed on a FGD, about half contained high fructose corn syrup as a major ingredient-  
226 not surprising given its prevalence in many foods in the US. Important to note is that the  
227 FGD was developed in Australia where high fructose corn syrup is not added to food as  
228 frequently as in the US.(15) Thus, in the US, restriction of foods containing this FODMAP  
229 (e.g., sodas, jams) is likely needed when children are placed on a FGD.

230 There are some limitations to our study. Parents may not have accurately recorded  
231 food intake of their children with the use of food records. However, 3-day food records  
232 are considered a valid method to record food consumption and are considered a better  
233 method of food capture compared to other approaches such as 24-hour recall.(26)  
234 Children were recruited from a single geographic area and diets may differ based on  
235 geographic location. On the other hand, our study population included a racially and  
236 ethnically diverse population which may increase the generalizability of our findings.  
237 Further studies in different geographic areas can be conducted to confirm our findings

238 A major strength of our study is that, to our knowledge, it is the first to characterize  
239 and compare the FODMAP intake of children with DGBI and HC. Also, the two  
240 populations were well-matched in terms of demographics, increasing the rigor of the  
241 findings. Additionally, the dietitians participating in the study had experience with  
242 analyzing food records for high FODMAP foods and maintained high quality in their  
243 review, including follow-up with families, if needed, regarding specific food record entries.

244 In summary, both children with DGBI and HC consume a significant amount of high  
245 FODMAP foods, though children with DGBI consume relatively less.. Fructans, lactose,  
246 and fructose were the most consumed FODMAP carbohydrates via wheat-containing

247 foods, dairy, and fruits/100% fruit juices. Targeted and less restrictive diets such as the  
248 FGD, with modification based on our findings, may effectively restrict a large majority of  
249 the high FODMAP foods consumed by children with DGBI.

## 250 REFERENCES

- 251 1. Thapar N, Benninga MA, Crowell MD, Di Lorenzo C, Mack I, Nurko S, et al. Paediatric  
252 functional abdominal pain disorders. *Nat Rev Dis Primers*. 2020;6(1):89.
- 253 2. Algera J, Colomier E, Simren M. The Dietary Management of Patients with Irritable  
254 Bowel Syndrome: A Narrative Review of the Existing and Emerging Evidence.  
255 *Nutrients*. 2019;11(9).
- 256 3. Barrett JS, Geary RB, Muir JG, Irving PM, Rose R, Rosella O, et al. Dietary poorly  
257 absorbed, short-chain carbohydrates increase delivery of water and fermentable  
258 substrates to the proximal colon. *Aliment Pharmacol Ther*. 2010;31(8):874-82.
- 259 4. Shepherd SJ, Lomer MC, Gibson PR. Short-chain carbohydrates and functional  
260 gastrointestinal disorders. *Am J Gastroenterol*. 2013;108(5):707-17.
- 261 5. Chumpitazi BP, Cope JL, Hollister EB, Tsai CM, McMeans AR, Luna RA, et al.  
262 Randomised clinical trial: gut microbiome biomarkers are associated with clinical  
263 response to a low FODMAP diet in children with the irritable bowel syndrome. *Aliment*  
264 *Pharmacol Ther*. 2015;42(4):418-27.
- 265 6. Khalighi Sikaroudi M, Soltani S, Ghoreishy SM, Ebrahimi Z, Shidfar F, Dehnad A.  
266 Effects of a low FODMAP diet on the symptom management of patients with irritable  
267 bowel syndrome: a systematic umbrella review with the meta-analysis of clinical  
268 trials. *Food Funct*. 2024;15(10):5195-208.
- 269 7. Jent S, Bez NS, Haddad J, Catalano L, Egger KS, Raia M, et al. The efficacy and  
270 real-world effectiveness of a diet low in fermentable oligo-, di-, monosaccharides and  
271 polyols in irritable bowel syndrome: A systematic review and meta-analysis. *Clinical*  
272 *nutrition*. 2024;43(6):1551-62.



- 273 8. Narayana V, McMeans AR, Levy RL, Shulman RJ, Chumpitazi BP. Children with  
274 functional abdominal pain disorders successfully decrease FODMAP food intake on  
275 a low FODMAP diet with modest improvements in nutritional intake and diet quality.  
276 *Neurogastroenterol Motil.* 2022;34(10):e14392.
- 277 9. Tenenbaum RB, Czyzewski D, McMeans A, Narayana V, Chumpitazi BP, Levy RL,  
278 et al. Factors Associated With Adherence to a Low Fermentable Carbohydrate Diet  
279 in Children With Functional Gastrointestinal Disorders. *Journal of the Academy of*  
280 *Nutrition and Dietetics.* 2024;124(6):757-62.
- 281 10. Maagaard L, Ankersen DV, Vegh Z, Burisch J, Jensen L, Pedersen N, et al. Follow-  
282 up of patients with functional bowel symptoms treated with a low FODMAP diet. *World*  
283 *J Gastroenterol.* 2016;22(15):4009-19.
- 284 11. Frieling T, Heise J, Krummen B, Hundorf C, Kalde S. Tolerability of FODMAP -  
285 reduced diet in irritable bowel syndrome - efficacy, adherence, and body weight  
286 course. *Z Gastroenterol.* 2019;57(6):740-4.
- 287 12. Halmos EP, Christophersen CT, Bird AR, Shepherd SJ, Gibson PR, Muir JG. Diets  
288 that differ in their FODMAP content alter the colonic luminal microenvironment. *Gut.*  
289 2015;64(1):93-100.
- 290 13. Mitchell H, Porter J, Gibson PR, Barrett J, Garg M. Review article: implementation of  
291 a diet low in FODMAPs for patients with irritable bowel syndrome-directions for future  
292 research. *Aliment Pharmacol Ther.* 2019;49(2):124-39.
- 293 14. Rhys-Jones D, Varney JE, Muir JG, Gibson PR, Halmos EP. Application of The  
294 FODMAP Diet in a Paediatric Setting. *Nutrients.* 2022;14(20).

- 295 15. Halmos EP, Gibson PR. Controversies and reality of the FODMAP diet for patients  
296 with irritable bowel syndrome. *J Gastroenterol Hepatol*. 2019;34(7):1134-42.
- 297 16. Hyams JS, Di Lorenzo C, Saps M, Shulman RJ, Staiano A, van Tilburg M. Functional  
298 Disorders: Children and Adolescents. *Gastroenterology*. 2016;150:1456–68.
- 299 17. Feskanich D, Sielaff BH, Chong K, Buzzard IM. Computerized collection and analysis  
300 of dietary intake information. *Comput Methods Programs Biomed*. 1989;30(1):47-57.
- 301 18. Czyzewski DI, Lane MM, Weidler EM, Williams AE, Swank PR, Shulman RJ. The  
302 interpretation of Rome III criteria and method of assessment affect the irritable bowel  
303 syndrome classification of children. *Aliment Pharmacol Ther*. 2011;33(3):403-11.
- 304 19. Self MM, Czyzewski DI, Chumpitazi BP, Weidler EM, Shulman RJ. Subtypes of  
305 irritable bowel syndrome in children and adolescents. *Clin Gastroenterol Hepatol*.  
306 2014;12(9):1468-73.
- 307 20. [Available from: [https://www.monashfodmap.com/ibs-central/i-have-ibs/get-the-](https://www.monashfodmap.com/ibs-central/i-have-ibs/get-the-app/)  
308 [app/](https://www.monashfodmap.com/ibs-central/i-have-ibs/get-the-app/)].
- 309 21. Saps M, Velasco-Benitez CA, Velasco-Suarez DA, Alvarez-Baumgartner M, Balda  
310 AN, Arrizabalo S. Gastrointestinal Symptoms and Fermentable Oligosaccharides,  
311 Disaccharides, Monosaccharides, and Polyols Sources in Schoolchildren-A Pilot  
312 Study. *Children (Basel)*. 2024;11(6).
- 313 22. Chumpitazi BP, Weidler EM, Lu DY, Tsai CM, Shulman RJ. Self-Perceived Food  
314 Intolerances Are Common and Associated with Clinical Severity in Childhood Irritable  
315 Bowel Syndrome. *Journal of the Academy of Nutrition and Dietetics*.  
316 2016;116(9):1458-64.

- 317 23. Moshfegh AJ, Friday JE, Goldman JP, Ahuja JK. Presence of inulin and oligofructose  
318 in the diets of Americans. *J Nutr.* 1999;129(7 Suppl):1407S-11S.
- 319 24. Shepherd SJ, Parker FC, Muir JG, Gibson PR. Dietary triggers of abdominal  
320 symptoms in patients with irritable bowel syndrome: randomized placebo-controlled  
321 evidence. *Clin Gastroenterol Hepatol.* 2008;6(7):765-71.
- 322 25. Yang J, Deng Y, Chu H, Cong Y, Zhao J, Pohl D, et al. Prevalence and presentation  
323 of lactose intolerance and effects on dairy product intake in healthy subjects and  
324 patients with irritable bowel syndrome. *Clin Gastroenterol Hepatol.* 2013;11(3):262-8  
325 e1.
- 326 26. Crawford PB, Obarzanek E, Morrison J, Sabry ZI. Comparative advantage of 3-day  
327 food records over 24-hour recall and 5-day food frequency validated by observation  
328 of 9- and 10-year-old girls. *J Am Diet Assoc.* 1994;94(6):626-30.
